1 **Mitochondrial sirtuins *sir-2.2* and *sir-2.3* regulate lifespan in *C. elegans***

2 Sarah M. Chang, Melanie R. McReynolds, Wendy Hanna-Rose\*

3

4 Department of Biochemistry and Molecular Biology,

5 The Pennsylvania State University, University Park, Pennsylvania, 16802 USA

6

7 \*Correspondence and requests for materials should be addressed to

8 Wendy Hanna-Rose

9 Department of Biochemistry and Molecular Biology

10 The Pennsylvania State University

11 104D Life Sciences Building

12 University Park, PA 16802

13 Tel: (+1)-814-865-7904

14 E-mail: [wxh21@psu.edu](mailto:wxh21@psu.edu)

15 **ABSTRACT**

16 Mitochondrial sirtuins regulate biochemical pathways and are emerging drug targets for  
17 metabolic and age-related diseases such as cancer, diabetes, and neurodegeneration. Yet, their  
18 functions remain unclear. Here, we uncover a novel physiological role for the *C. elegans*  
19 mitochondrial sirtuins, *sir-2.2* and *sir-2.3*, in lifespan regulation. Using a genetic approach, we  
20 demonstrate that *sir-2.2* and *sir-2.3* mutants live 28-30% longer than controls when fed the  
21 normal lab diet of *E. coli* OP50. Interestingly, this effect is diet specific and is not observed when  
22 animals are fed the strain HT115, which is typically used for RNAi experiments. While  
23 decreased consumption of food is a known mechanism for lifespan extension, this does not  
24 account for the increased lifespan in the mitochondrial sirtuin mutants. *sir-2.2* and *sir-2.3*  
25 mutants display altered expression of genes involved in oxidative stress response, including  
26 increased expression of the mitochondrial superoxide dismutase *sod-3* and decreased levels of  
27 catalases *ctl-1* and *ctl-2*. Like their extended lifespan phenotype, these alterations in oxidative  
28 stress gene expression are diet dependent. The mitochondrial sirtuin mutants are more resistant to  
29 the lifespan extending effects of low levels of superoxide, suggesting that their increased lifespan  
30 involves a hormetic response. Our data suggest that *sir-2.2* and *sir-2.3* are not completely  
31 redundant in function and may possess overlapping yet distinct mechanisms for regulating  
32 oxidative stress response and lifespan.

33

34 **Keywords:** sirtuins, *C. elegans*, lifespan, hormesis, superoxide dismutase, catalase

35

## 36 **Introduction**

37           Sirtuins are a highly conserved family of NAD<sup>+</sup>-dependent enzymes that use NAD<sup>+</sup> as a  
38 cofactor to execute mono-ADP ribosylation, deacetylation and a variety of other deacylation  
39 reactions (Blander & Guarente, 2004; Haigis et al., 2006; Houtkooper, Pirinen, & Auwerx, 2012).  
40 Distinct sirtuin family members are active in the cytoplasm, the nucleus, and the mitochondria,  
41 and act as molecular sensors and regulators of the cell's metabolic state (Guarente, 2011; Haigis  
42 & Sinclair, 2010; He, Newman, Wang, Ho, & Verdin, 2012). Sirtuins are named for the  
43 *Saccharomyces cerevisiae* protein Sir2 (silent information regulator 2), which increases yeast  
44 replicative lifespan when overexpressed (Kaeberlein, McVey, & Guarente, 1999). Genes and  
45 proteins with roles in lifespan extension have attracted much attention. As such, Sir2 is a well-  
46 studied protein, and its orthologs have also been extensively explored in many model systems.  
47 For example, over-expression of the *C. elegans* nuclear sirtuin SIR-2.1 was first shown to share  
48 lifespan enhancing functions with Sir2 more than a decade ago (Tissenbaum & Guarente, 2001).  
49 More recently, the robustness and extent of the lifespan functions of SIR-2.1 have been  
50 questioned (Burnett et al., 2011). Nonetheless extensive research on SIR-2.1 in *C. elegans* and  
51 orthologous sirtuins in other systems supports the model that the protein is a key player in  
52 modulating progression of aging as well as healthspan phenotypes via regulation of metabolism  
53 and oxidative stress responses (Aka, Kim, & Yang, 2011; Chang & Guarente, 2014; Guarente,  
54 2013).

55           Mammals have seven sirtuins, SIRT1-7. Three of these sirtuins, SIRT3-5, reside in the  
56 mitochondria (Houtkooper et al., 2012). SIRT3 is a deacetylase that regulates the activity of  
57 various metabolic enzymes and the mitochondrial manganese-dependent superoxide dismutase  
58 SOD2 (Qiu, Brown, Hirschey, Verdin, & Chen, 2010; Schwer, Bunkenborg, Verdin, Andersen,

59 & Verdin, 2006; Tao et al., 2010). It is the major deacetylase in the mitochondria (Lombard et al.,  
60 2007). The enzymatic functions of SIRT4 are the least characterized of the mitochondrial sirtuins  
61 (Haigis et al., 2006; He et al., 2012). SIRT4 is an ADP-ribosyltransferase that inhibits glutamate  
62 dehydrogenase and regulates insulin secretion (Ahuja et al., 2007; Haigis et al., 2006). Recently,  
63 studies have revealed the ability of SIRT4 to deacetylate malonyl CoA decarboxylase and  
64 control lipid homeostasis (Laurent et al., 2013). This is the first reported deacetylase activity for  
65 SIRT4, which has long thought to lack deacetylase activity (Ahuja et al., 2007). SIRT5  
66 possesses demalonylase and succinylase activities (Du et al., 2011) and modifies the carbamoyl  
67 phosphate synthetase CPS1 to regulate the urea cycle (Du et al., 2011; Nakagawa, Lomb, Haigis,  
68 & Guarente, 2009).

69 In *C. elegans*, there are four sirtuins, SIR-2.1 to SIR-2.4. Two, SIR-2.2 and SIR-2.3,  
70 localize in the mitochondria (Wirth et al., 2013). While SIR-2.1 is well-studied, there is much  
71 less known about the biological roles of SIR-2.2 and SIR-2.3. These mitochondrial sirtuin genes  
72 are located adjacent to each other on chromosome X and share 75.3% sequence identity,  
73 suggesting that one developed from a gene duplication event (Wirth et al., 2013). They are  
74 orthologs of the mammalian SIRT4 protein (Jedrusik-Bode, 2014; Wirth et al., 2013). SIR-2.2  
75 and SIR-2.3 in *C. elegans* physically interact with the mitochondrial biotin-dependent enzymes  
76 pyruvate carboxylase, propionyl-CoA carboxylase, and methylcrotonyl-CoA carboxylase (Wirth  
77 et al., 2013). Yet, the biological and physiological functions of SIR-2.2 and SIR-2.3 in *C.*  
78 *elegans* are largely unknown, and the mammalian SIRT4 protein is not fully studied (Haigis et  
79 al., 2006). We have explored the biological function of mitochondrial SIRT4 proteins using a  
80 genetic approach in *C. elegans*. We reveal that mutation of either of the *C. elegans* mitochondrial

81 sirtuins *sir-2.2* and *sir-2.3* results in an extended lifespan, revealing novel roles in lifespan  
82 regulation and lack of redundancy of these similar proteins.

83

## 84 **Results**

### 85 **Mitochondrial sirtuin mutants live longer than N2 when fed *E. coli* OP50 *ad libitum***

86 We acquired *C. elegans* sirtuin mutant strains to determine if any sirtuin plays a role in  
87 mediating phenotypic outcomes in a variety of mutants with defects in biosynthesis of NAD<sup>+</sup>, the  
88 sirtuin co-substrate. *sir-2.2(tm2673)* and *sir-2.3(ok444)* are deletion alleles that each remove  
89 portions of the sirtuin domain (see Materials and Methods, Wirth et al. 2013). In the process of  
90 examining the mutant strains over a developmental time course, we noted that the mitochondrial  
91 sirtuin mutants were more robust than the N2 control strain as they approached old age. We  
92 directly examined the aging of the animals by comparing the lifespan of the *sir-2.2(tm2673)* and  
93 *sir-2.3(ok444)* mutants relative to the control N2 strain to which they were backcrossed three  
94 times. Loss of *sir-2.2* or *sir-2.3* function resulted in an unexpected 28-30% increase in lifespan  
95 compared to the control N2 strain when fed *E. coli* OP50 *ad libitum* (Figure 1a,b). *sir-2.2*  
96 mutants lived an average of 4.2 days longer than N2, and *sir-2.3* mutants lived an average of 3.9  
97 days longer than N2. This increased lifespan was consistently observed across four to five  
98 independent experiments (Table 1). To test whether the increased lifespan observed in single  
99 mitochondrial sirtuin mutants was due to upregulation of the remaining mitochondrial sirtuin, we  
100 measured mRNA levels of *sir-2.3* in the *sir-2.2(tm2673)* mutant and mRNA levels of *sir-2.2* in  
101 the *sir-2.3(ok444)* mutant. No compensatory upregulation was observed (Figure 1c).

102

103

104 **Lifespan extension due to loss of *sir-2.2* or *sir-2.3* is diet dependent**

105 In control experiments in preparation for RNAi experiments, we noted that food source  
106 had an effect on lifespan of *sir-2.2* and *sir-2.3* mutants. Feeding with the *E. coli* HT115 strain  
107 used for administering RNAi had no effect on lifespan of N2 control animals but decreased the  
108 lifespan of *sir-2.2* and *sir-2.3* mutants (Figure 2a,b,c). The lifespan of *sir-2.2(tm2673)* on HT115  
109 is 73% of its lifespan on OP50, or around four days shorter when fed HT115 compared to OP50  
110 (Figure 2b,c). The lifespan of *sir-2.3(ok444)* on HT115 is 77% of its lifespan on OP50, or around  
111 three days shorter when fed HT115 compared to OP50 (Figure 2b,c). Interestingly, the survival  
112 and mean lifespan of *sir-2.3(ok444)* was still significantly extended compared to N2 when fed  
113 HT115 whereas that of *sir-2.2(tm2673)* on HT115 was no different than N2 (Figure 2a,b,c).  
114 Therefore, growth on HT115 appears to eliminate the lifespan extension of *sir-2.2(tm2673)*  
115 relative to N2 and reduces that of *sir-2.3(ok444)*, suggesting that the extended lifespan  
116 phenotypes of *sir-2.2(tm2673)* and *sir-2.3(ok444)* are both diet dependent, but the diet effect is  
117 more pronounced in *sir-2.2(tm2673)* relative to *sir-2.3(ok444)*.

118

119 **Changes in food intake do not contribute to the extended lifespan of *sir-2.2* and *sir-2.3***  
120 **mutants**

121 Because dietary restriction increases lifespan (Sohal & Weindruch, 1996), we  
122 investigated whether the lifespan extension of the mitochondrial sirtuin mutants was due to  
123 decreased food intake. Muscular contractions of the pharynx pump food into the *C. elegans*  
124 intestine (Avery & You, 2012). Thus, we measured pharyngeal pumping rates as an indicator of  
125 food intake. We measured the pharyngeal pumping rate of N2, *sir-2.2(tm2673)*, and *sir-*  
126 *2.3(ok444)* fed OP50 *ad libitum* or fed OP50 for five minutes after a six hour fasting period.

127 There was no observed difference between the N2 control and the mitochondrial sirtuin mutants  
128 whether they were fed *ad libitum* or post-fasting, suggesting that decreased food intake does not  
129 contribute to the increase in lifespan of *sir-2.2(tm2673)* or *sir-2.3(ok444)* (Figure 3a,b).

130

131 **A hormetic response may underlie the lifespan extension produced by loss of the**  
132 **mitochondrial sirtuins**

133 Both *sir-2.2(tm2673)* and *sir-2.3(ok444)* mutants are hypersensitive to high levels of  
134 oxidative stress (Wirth et al., 2013), suggesting that the proteins might help ameliorate stress and  
135 additionally may experience an elevated constitutive level of oxidative stress. We hypothesized  
136 that a mounted response to constitutive mild oxidative stress potentially experienced by *sir-2.2*  
137 and *sir-2.3* mutants, a hormetic response, could mediate the extended lifespan. To investigate  
138 this hypothesis, we first examined the mutant strains for evidence of a stress response by  
139 measuring the mRNA levels of key oxidative stress response genes including the mitochondrial  
140 superoxide dismutases *sod-2* and *sod-3*, the cytoplasmic catalase *ctl-1*, and the peroxisomal  
141 catalase *ctl-2*. *sod-2* mRNA levels were unchanged in either mitochondrial sirtuin mutant (Figure  
142 S1). *sod-3* mRNA levels were elevated more than three-fold in *sir-2.2* mutants and more than  
143 two-fold in *sir-2.3* (Figure 4a). In contrast, levels of *ctl-1* and *ctl-2* messages were depressed  
144 approximately two-fold in both *sir-2.2* and *sir-2.3* compared to N2 (Figure 4a).

145 To test whether food source affects regulation of *sod-3*, *ctl-1*, and *ctl-2* in the  
146 mitochondrial sirtuin mutants, we measured the mRNA levels of these genes in control and  
147 mutant animals fed HT115. On HT115, *sir-2.2* and *sir-2.3* mutants show approximately a two-  
148 fold increase in *ctl-1* and *ctl-2* mRNA levels as opposed to a two-fold decrease when these  
149 animals are fed OP50 (Figure 4a). Unlike the two to three-fold increase in *sod-3* in the

150 mitochondrial sirtuin mutants fed OP50, *sod-3* expression is unchanged compared to the control  
151 strain (Figure 4a). Thus, the detected gene expression changes correlate with lifespan. These data  
152 support the hypothesis that the changes in *sod-3*, *ctl-1*, and *ctl-2* expression observed when  
153 mitochondrial sirtuin mutant animals are fed OP50 may play a role in the extended lifespan of  
154 *sir-2.2(tm2673)* and *sir-2.3(ok444)*.

155 To seek independent evidence for the changes in *sod-3* expression in *sir-2.2* and *sir-2.3*,  
156 we placed a *psod-3::gfp* transgene in both the *sir-2.2* and *sir-2.3* mutant background and  
157 measured *sod-3* expression levels via intensity of GFP expression in the pharynx. On OP50,  
158 there was a significant increase in mean GFP intensity in *sir-2.2* mutants whereas the mean GFP  
159 intensity of *sod-3::GFP* was slightly increased in *sir-2.3* mutants. This increase did not rise to the  
160 level of statistical significance (Figure 4b,c).

161 To further test the hypothesis that a hormetic response contributes to the extended  
162 lifespan of the mitochondrial sirtuin mutants, we treated the animals with low or high levels of  
163 paraquat, a superoxide radical generator. Low levels of superoxide generators, such as 0.1 mM of  
164 paraquat, extend the lifespan of wild-type worms (Yang & Hekimi, 2010). If the mitochondrial  
165 sirtuin mutants are already experiencing elevated oxidative stress, we suspected that 0.1 mM of  
166 paraquat would not extend their lifespans further. Indeed N2 worms treated with 0.1 mM  
167 paraquat lived 35.3% longer, extending their lifespan to 18.8 days from 13.9 days (Figure 5a,e).  
168 *sir-2.2* mutants did not show an extended lifespan whereas *sir-2.3* mutants lived approximately  
169 17.6% longer, extending their lifespan to 20 days from 17 days (Figure 5b,c,e). This supports the  
170 hypothesis that a hormetic response in both *sir-2.2* and *sir-2.3* mutants mediates their increased  
171 lifespan. Because *sir-2.3* mutant lifespan was increased upon treating with low levels of paraquat,  
172 a hormetic response may be mediating the lifespan extension in the *sir-2.3* mutant to a lesser



173 degree than *sir-2.2* mutants. As previously published, *sir-2.2* and *sir-2.3* mutants were more  
174 sensitive than controls to the high concentration of 3.75 mM paraquat (Figure 5d,e, Wirth et al.  
175 2013).

176

## 177 **Discussion**

178 In this study, we uncovered a novel role for the mitochondrial sirtuins *sir-2.2* and *sir-2.3*  
179 in lifespan regulation; removing either of their activities increases lifespan by more than 25 %.  
180 Interestingly, *sir-2.1* mutants have also been reported to have an increased lifespan compared to  
181 controls when fed OP50 *ad libitum* (Moroz et al., 2014). Here, we reveal that the lifespan  
182 extending mechanisms in *sir-2.2* and *sir-2.3* mutants are diet dependent and mediated in part by  
183 response to oxidative stress. Expression analyses have indicated that SIR-2.2 and SIR-2.3 are not  
184 functionally redundant as they are expressed at different times during embryogenesis and have  
185 shown to be localized in different tissues (Wirth et al., 2013). Our results support their non-  
186 redundancy and uncover the presence of stress-related phenotypic differences between the two.

187 When fed the *E. coli* strain HT115, *sir-2.2* and *sir-2.3* mutants no longer had the  
188 increased lifespan present on OP50. However, *sir-2.3* mutants still had an extended lifespan  
189 compared to N2 when fed HT115. The lifespan of *C. elegans* is regulated by their ability to  
190 respond to changes in diet (Pang & Curran, 2014). When fed either OP50 or HT115, N2 animals  
191 have similar lifespans, as observed in this study and published elsewhere (Brooks, Liang, &  
192 Watts, 2009). This ability to adapt to different diets seems to involve *sir-2.2* and *sir-2.3*, as *sir-*  
193 *2.2* and *sir-2.3* mutant worms do not have the same lifespan upon a switch to a different food  
194 source, unlike control animals. It is necessary to investigate the mechanism used by *C. elegans* in

195 response to changes in diet to uncover the specific role mitochondrial sirtuins may play in this  
196 process.

197 Curiously, unlike *age-1* and *daf-2* mutants, which have increased catalase activity  
198 (Larsen, 1993; Vanfleteren, 1993), both *sir-2.2* and *sir-2.3* exhibit an approximate two-fold  
199 decrease in catalase mRNA levels, an unexpected result due to catalase's function in detoxifying  
200 hydrogen peroxide. Although cytosolic catalase is required to extend lifespan of *daf-2* mutants,  
201 catalase inactivation extended the lifespan of *Saccharomyces cerevisiae* due to induction of  
202 superoxide dismutase (Mesquita et al., 2010). It is not well understood why both *sir-2.2* and *sir-*  
203 *2.3* may decrease their catalase levels.

204 While the lifespan extending mechanism in *sir-2.2* and *sir-2.3* mutants still requires  
205 investigation, our works emphasizes the importance of the sirtuin family as modulators of  
206 oxidative stress response and lifespan and broadens our ability to target this class of proteins for  
207 new therapies, potentially in ways that can improve healthspan.

208

## 209 **Materials and Methods**

### 210 *Nematode strains and maintenance*

211 *C. elegans* strains were maintained using standard methods at 20° C on *E. coli* OP50 (Brenner,  
212 1974). We used the strains N2 Bristol as the wild-type control, RB654 *sir-2.3(ok444)*, and  
213 CF1553 *mul84[(pAD476) sod-3p::GFP + rol-6]* which were provided by *Caenorhabditis*  
214 Genetics Center (CGC). We also used *sir-2.2(tm2673)*, which was provided by the Mitani lab  
215 through the National Bio-Resource Project of the MEXT, Japan. *sir-2.2(tm2673)* and *sir-*

216 *2.3(ok444)* were each outcrossed three times into the N2 strain that was used for a control for all  
217 experiments.

218 *sir-2.2(tm2673)* is a deletion allele that removes exons 3 and 4, corresponding to 75 amino acids  
219 of the sirtuin domain (Wirth et al., 2013). The deletion allele *sir-2.3(ok444)* removes part of exon  
220 3, all of 4 and 5 and a portion of exon 6, generating an in-frame stop codon, resulting in a  
221 truncation of 141 amino acids from the C terminus of the protein (Wirth et al., 2013).

222

### 223 ***Lifespan Analysis***

224 Lifespan assays were conducted at 20°C on standard NGM plates with 400 µl of *E. coli* OP50 or  
225 HT115 and were replicated in at least three independent experiments. Animals were  
226 synchronized using a timed egg lay or an egg preparation (Sulston & Hodgkin, 1988). 30 L4  
227 animals were placed on individual plates at the start of the assay and moved to new plates every  
228 day. To assess survival, worms were prodded with a platinum wire every day and scored as dead  
229 if non-responsive. Worms with internal hatching or an “exploded” phenotype were censored.

230

231 For paraquat lifespan analysis, 200 µl of paraquat (methyl viologen dichloride hydrate 98%,  
232 Sigma) diluted in water was added to NGM plates spotted with 400 µl OP50 for a final  
233 concentration of 3.75 mM, 1.0 mM or 0.1 mM paraquat. 30 synchronized L4 worms were placed  
234 on individual plates at the start of the assay and transferred to new plates every day. Results  
235 represent an average of three independent experiments.

236

237

238

239 ***Pharyngeal Pumping***

240 Pharyngeal pumping was measured in day one adults fed *ad libitum* or five minutes post six hour  
241 fasting period on OP50 as described (Lemieux et al., 2015). All worms were grown on OP50 at  
242 20° C. Pumping rates were measured in ten second intervals using a Nikon SMZ1500  
243 stereoscope equipped with Roper Scientific Photometrics CoolSnap EZ camera.

244 ***Quantitative RT-PCR***

245 RNA was isolated from mixed stage worms using TRIZOL reagent (Invitrogen). 1 µg of RNA  
246 was converted to cDNA using the qScript cDNA Synthesis Kit (Quanta Biosciences). cDNA was  
247 diluted 1:10 and used for quantitative PCR using SYBR Green and Applied Biosciences RT-  
248 PCR machine. A combination of three control primer sets (*cdc-42*, *tba-1*, and *pmp-3*) were used.

249 *cdc-42* F: ctgctggacaggaagattacg; R: ctgggacattctcgaatgaag

250 *tba-1* F: gtacactccactgatctctctgaca; R: ctctgtacaagaggcaaacagccatg

251 *pmp-3* F: gttcccgtgttcactcat; R: acaccgtcgagaagctgtaga

252 *sir-2.2* F: ggtatcccagattaccgctcg; R: ccaaatctcggccaggctaa

253 *sir-2.3* F: ggaactcatggcaacgctc; R: gaacccttgttcgctacca

254 *sod-2* F: gaggcggctctccaaagaaa; R: ccagagatccgaagtcgctc

255 *sod-3* F: ctccaagcacactctcccag; R: tcccttcgaaacagcctcg

256 *ctl-1* F: acaaggagacgatccaaaacc; R: tccagcgaccgtgaaaaac

257 *ctl-2* F: ctacagtcggtggtgagagc; R: tacccatctgggagtcctcg

258 Results represent the average of two independent biological samples unless otherwise denoted,  
259 each of which was amplified in triplicate.

260

261

262 **sod-3::GFP expression quantification**

263 Day 1 adult animals were placed on unspotted NGM plates, treated with 1 mM levamisole to  
264 restrict movement, and imaged on a Nikon SMZ1500 stereoscope. Images were collected using  
265 Roper Scientific Photometrics CoolSnap EZ camera using a 19.05 second exposure at 10x  
266 magnification. Images were analyzed using ImageJ to measure mean GFP intensity in the  
267 pharynx of each animal with background removed.

268

269 **Acknowledgements**

270 Strains were provided by the Caenorhabditis Genetics Center, which is funded by NIH Office of  
271 Research Infrastructure Programs (P40 OD010440), and the Mitani Lab through the National  
272 Bio-Resource Project of the MEXT, Japan. This work was supported by National Institutes of  
273 Health award number GM086786 to WHR.

274

275

276 **Contributions**

277 SMC conceived and coordinated the study. SMC performed experiments in Figures 1 through 5  
278 and analyzed results. SMC and MRM performed experiments in Figure 4a and SMC analyzed  
279 results. SMC and WHR wrote the paper.

280 **Literature Cited**

- 281 Ahuja, N., Schwer, B., Carobbio, S., Waltregny, D., North, B. J., Castronovo, V., ... Verdin, E.  
282 (2007). Regulation of insulin secretion by SIRT4, a mitochondrial ADP-ribosyltransferase.  
283 *Journal of Biological Chemistry*, 282(46), 33583–33592.  
284 <http://doi.org/10.1074/jbc.M705488200>
- 285 Aka, J. A., Kim, G., & Yang, X. (2011). *Histone Deacetylases: the Biology and Clinical*  
286 *Implication. Group* (Vol. 206). <http://doi.org/10.1007/978-3-642-21631-2>
- 287 Avery, L., & You, Y.-J. (2012). *C. elegans* feeding. *WormBook: The Online Review of C.*  
288 *Elegans Biology*, 1–23. <http://doi.org/10.1895/wormbook.1.150.1>
- 289 Blander, G., & Guarente, L. (2004). The Sir2 Family of Protein Deacetylases. *Annual Review of*  
290 *Biochemistry*, 73(1), 417–435. <http://doi.org/10.1146/annurev.biochem.73.011303.073651>
- 291 Brenner, S. (1974). The genetics of *Caenorhabditis elegans*. *Genetics*, 71–94.
- 292 Brooks, K. K., Liang, B., & Watts, J. L. (2009). The influence of bacterial diet on fat storage in  
293 *C. elegans*. *PLoS ONE*, 4(10). <http://doi.org/10.1371/journal.pone.0007545>
- 294 Burnett, C., Valentini, S., Cabreiro, F., Goss, M., Somogyvári, M., Piper, M. D., ... Gems, D.  
295 (2011). Absence of effects of Sir2 overexpression on lifespan in *C. elegans* and *Drosophila*.  
296 *Nature*, 477(7365), 482–5. <http://doi.org/10.1038/nature10296>
- 297 Chang, H. C., & Guarente, L. (2014). SIRT1 and other sirtuins in metabolism. *Trends in*  
298 *Endocrinology and Metabolism*, 25(3), 138–145. <http://doi.org/10.1016/j.tem.2013.12.001>
- 299 Du, J., Zhou, Y., Su, X., Yu, J. J., Khan, S., Jiang, H., ... Lin, H. (2011). Sirt5 Is a NAD-  
300 Dependent Protein Lysine Demalonylase and Desuccinylase. *Science*, 334(6057), 806–809.
- 301 Guarente, L. (2011). Sirtuins, aging, and metabolism. *Cold Spring Harbor Symposia on*  
302 *Quantitative Biology*, 76, 81–90. <http://doi.org/10.1101/sqb.2011.76.010629>

- 303 Guarente, L. (2013). Calorie restriction and sirtuins revisited Calorie restriction and sirtuins  
304 revisited. *Genes and Development*, 27, 2072–2085. <http://doi.org/10.1101/gad.227439.113>
- 305 Haigis, M. C., Mostoslavsky, R., Haigis, K. M., Fahie, K., Christodoulou, D. C., Murphy, A.  
306 J., ... Guarente, L. (2006). SIRT4 inhibits glutamate dehydrogenase and opposes the effects  
307 of calorie restriction in pancreatic beta cells. *Cell*, 126(5), 941–54.  
308 <http://doi.org/10.1016/j.cell.2006.06.057>
- 309 Haigis, M. C., & Sinclair, D. A. (2010). Mammalian sirtuins: biological insights and disease  
310 relevance. *Annual Review of Pathology*, 5, 253–95.  
311 <http://doi.org/10.1146/annurev.pathol.4.110807.092250>
- 312 He, W., Newman, J. C., Wang, M. Z., Ho, L., & Verdin, E. (2012). Mitochondrial sirtuins:  
313 Regulators of protein acylation and metabolism. *Trends in Endocrinology and Metabolism*,  
314 23(9), 467–476. <http://doi.org/10.1016/j.tem.2012.07.004>
- 315 Houtkooper, R. H., Pirinen, E., & Auwerx, J. (2012). Sirtuins as regulators of metabolism and  
316 healthspan. *Nature Reviews Molecular Cell Biology*, 13(4), 225–238.  
317 <http://doi.org/10.1038/nrm3293>
- 318 Jedrusik-Bode, M. (2014). C. elegans sirtuin SIR-2.4 and its mammalian homolog SIRT6 in  
319 stress response. *Worm*, (May), 7–9.
- 320 Kaeberlein, M., McVey, M., & Guarente, L. (1999). The SIR2/3/4 complex and SIR2 alone  
321 promote longevity in *Saccharomyces cerevisiae* by two different mechanisms. *Genes and*  
322 *Development*, 13(19), 2570–2580. <http://doi.org/10.1101/gad.13.19.2570>
- 323 Larsen, P. L. (1993). Aging and resistance to oxidative damage in *Caenorhabditis elegans*. *PNAS*,  
324 90(October), 8905–8909.
- 325 Laurent, G., German, N. J., Saha, A. K., de Boer, V. C. J., Davies, M., Koves, T. R., ... Haigis,

- 326 M. C. (2013). SIRT4 coordinates the balance between lipid synthesis and catabolism by  
327 repressing malonyl CoA decarboxylase. *Molecular Cell*, *50*(5), 686–698.  
328 <http://doi.org/10.1016/j.molcel.2013.05.012>
- 329 Lemieux, G. A., Cunningham, K. A., Lin, L., Mayer, F., Werb, Z., & Ashrafi, K. (2015).  
330 Kynurenic acid is a nutritional cue that enables behavioral plasticity. *Cell*, *160*(1–2), 119–  
331 131. <http://doi.org/10.1016/j.cell.2014.12.028>
- 332 Lombard, D. B., Alt, F. W., Cheng, H.-L. H.-L., Bunkenborg, J., Streeper, R. S., Mostoslavsky,  
333 R., ... Schwer, B. (2007). Mammalian Sir2 homolog SIRT3 regulates global mitochondrial  
334 lysine acetylation. *Molecular and Cellular Biology*, *27*(24), 8807–14.  
335 <http://doi.org/10.1128/MCB.01636-07>
- 336 Mesquita, A., Weinberger, M., Silva, A., Sampaio-Marques, B., Almeida, B., Leão, C., ...  
337 Ludovico, P. (2010). Caloric restriction or catalase inactivation extends yeast chronological  
338 lifespan by inducing H<sub>2</sub>O<sub>2</sub> and superoxide dismutase activity. *Proceedings of the National*  
339 *Academy of Sciences of the United States of America*, *107*(34), 15123–8.  
340 <http://doi.org/10.1073/pnas.1004432107>
- 341 Moroz, N., Carmona, J. J., Anderson, E., Hart, A. C., Sinclair, D. A., & Blackwell, T. K. (2014).  
342 Dietary restriction involves NAD<sup>+</sup>-dependent mechanisms and a shift toward oxidative  
343 metabolism. *Aging Cell*, *13*(6), 1075–1085. <http://doi.org/10.1111/accel.12273>
- 344 Nakagawa, T., Lomb, D. J., Haigis, M. C., & Guarente, L. (2009). SIRT5 Deacetylates  
345 Carbamoyl Phosphate Synthetase 1 and Regulates the Urea Cycle. *Cell*, *137*(3), 560–570.  
346 <http://doi.org/10.1016/j.cell.2009.02.026>
- 347 Pang, S., & Curran, S. P. (2014). Adaptive capacity to bacterial diet modulates aging in *C.*  
348 *elegans*. *Cell Metabolism*, *19*(2), 221–231. <http://doi.org/10.1016/j.cmet.2013.12.005>



- 349 Qiu, X., Brown, K., Hirschey, M. D., Verdin, E., & Chen, D. (2010). Calorie Restriction  
350 Reduces Oxidative Stress by SIRT3-Mediated SOD2 Activation. *Cell Metabolism*, *12*(6),  
351 662–667. <http://doi.org/10.1016/j.cmet.2010.11.015>
- 352 Schwer, B., Bunkenborg, J., Verdin, R. O., Andersen, J. S., & Verdin, E. (2006). Reversible  
353 lysine acetylation controls the activity of the mitochondrial enzyme acetyl-CoA synthetase  
354 2. *Proceedings of the National Academy of Sciences*, *103*(27), 10224–10229.
- 355 Sohal, R. S., & Weindruch, R. (1996). Oxidative stress, caloric restriction, and aging. *Science*  
356 (*New York, N.Y.*), *273*(5271), 59–63. <http://doi.org/10.1126/science.273.5271.59>
- 357 Sulston, J., & Hodgkin, J. (1988). Methods. in: Wood, W.B. (ed.) *The Nematode Caenorhabditis*  
358 *elegans*. *Cold Spring Harbor Laboratory, Cold Spring Harbor*, *17*, 587–606.
- 359 Tao, R., Coleman, M. C., Pennington, J. D., Ozden, O., Park, S., Jiang, H., ... Gius, D. (2010).  
360 Article of Evolutionarily Conserved Lysine 122 Regulates MnSOD Activity in Response to  
361 Stress. *Molecular Cell*, *40*(6), 893–904. <http://doi.org/10.1016/j.molcel.2010.12.013>
- 362 Tissenbaum, H. a, & Guarente, L. (2001). Increased dosage of a Sir-2 gene extends lifespan in  
363 *Caenorhabditis elegans*. *Nature*, *410*(6825), 227–230. <http://doi.org/10.1038/35065638>
- 364 Vanfleteren, J. R. (1993). Oxidative stress and ageing in *Caenorhabditis elegans*. *Biochemical*  
365 *Journal*, *292*(2), 605–608.
- 366 Wirth, M., Karaca, S., Wenzel, D., Ho, L., Tishkoff, D., Lombard, D. B., ... Fischle, W. (2013).  
367 Mitochondrial SIRT4-type proteins in *Caenorhabditis elegans* and mammals interact with  
368 pyruvate carboxylase and other acetylated biotin-dependent carboxylases. *Mitochondrion*.  
369 <http://doi.org/10.1016/j.mito.2013.02.002>
- 370 Yang, W., & Hekimi, S. (2010). A Mitochondrial Superoxide Signal Triggers Increased  
371 Longevity in *Caenorhabditis elegans*. *PLoS Biology*, *8*(12).

372 <http://doi.org/10.1371/journal.pbio.1000556>

373

**Table 1. Mean lifespan values of N2, *sir-2.2(tm2673)*, and *sir-2.3(ok444)* fed *ad libitum* on**

**OP50**

| Experiment | Genotype               | Mean Lifespan $\pm$ SEM | n  | p-value (one-way ANOVA) |
|------------|------------------------|-------------------------|----|-------------------------|
| 1          | N2                     | 15.92 $\pm$ 0.68        | 41 | p=0.017840              |
|            | <i>sir-2.3(ok444)</i>  | 17.83 $\pm$ 0.56        | 57 |                         |
| 2          | N2                     | 10.54 $\pm$ 0.67        | 64 | p<0.0001                |
|            | <i>sir-2.2(tm2673)</i> | 19.98 $\pm$ 0.75        | 67 |                         |
|            | <i>sir-2.3(ok444)</i>  | 19.87 $\pm$ 0.59        | 64 |                         |
| 3          | N2                     | 14.27 $\pm$ 0.48        | 64 | p<0.0001                |
|            | <i>sir-2.2(tm2673)</i> | 17.71 $\pm$ 0.67        | 62 |                         |
|            | <i>sir-2.3(ok444)</i>  | 17.52 $\pm$ 0.66        | 60 |                         |
| 4          | N2                     | 13.46 $\pm$ 0.53        | 64 | p<0.0001                |
|            | <i>sir-2.2(tm2673)</i> | 16.22 $\pm$ 0.51        | 74 |                         |
|            | <i>sir-2.3(ok444)</i>  | 16.57 $\pm$ 0.51        | 71 |                         |
| 5          | N2                     | 15.07 $\pm$ 0.31        | 74 | p<0.0001                |
|            | <i>sir-2.2(tm2673)</i> | 18.30 $\pm$ 0.34        | 69 |                         |
|            | <i>sir-2.3(ok444)</i>  | 17.02 $\pm$ 0.32        | 77 |                         |

Figure 1

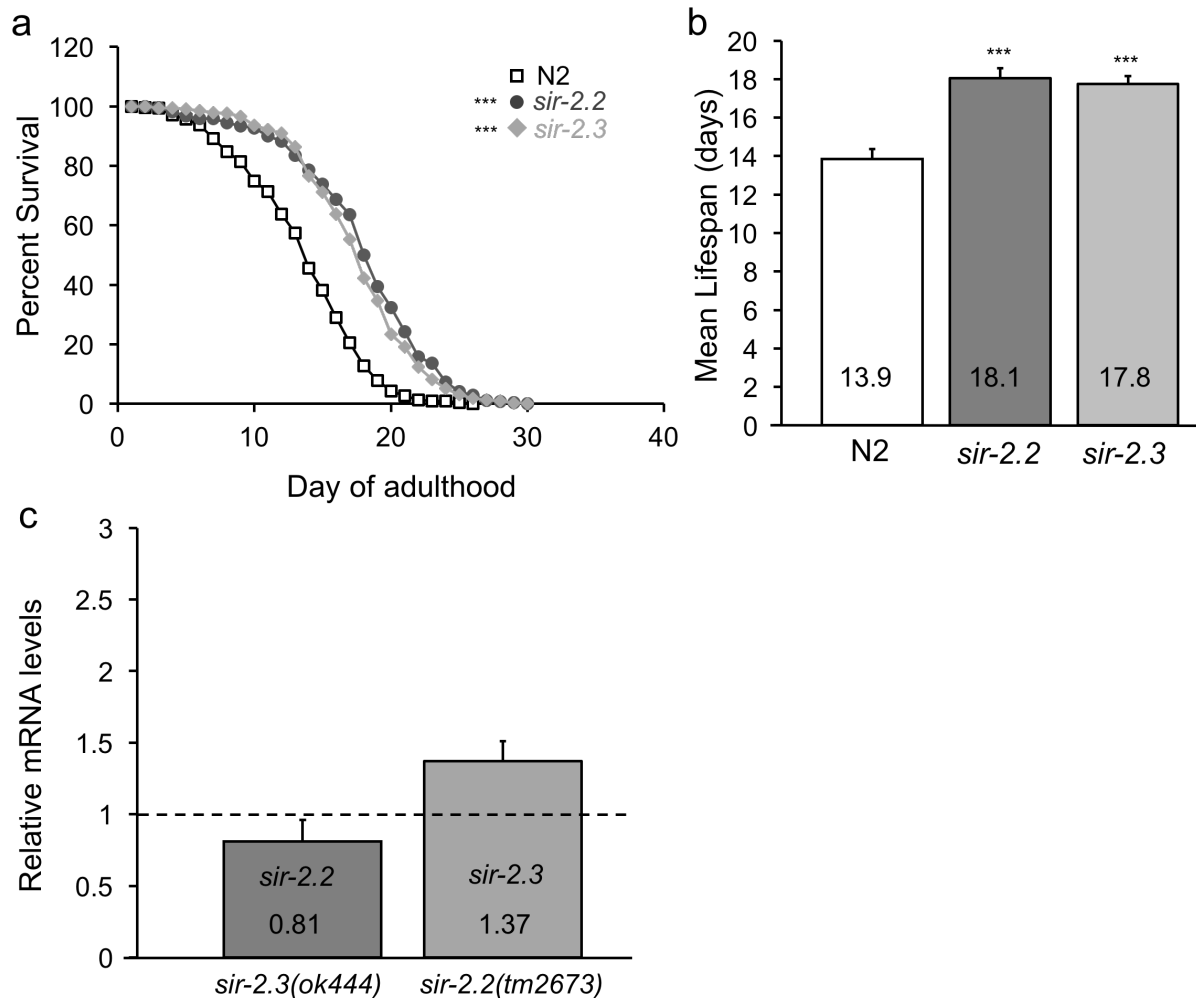

**Figure 1. *sir-2.2(tm2673)* and *sir-2.3(ok444)* lifespan on OP50. (a)** Survival curve of N2 control, *sir-2.2(tm2673)* and *sir-2.3(ok444)* fed *ad libitum* on OP50 across 4-5 experiments (See Table 1), \*\*\*p<0.001, log rank t-test. **(b)** Mean lifespan values  $\pm$ SEM of N2 control, *sir-2.2(tm2673)* and *sir-2.3(ok444)* when animals were fed OP50. Statistical analysis performed via one-way ANOVA followed by Tukey's post hoc test, where \*\*\*p<0.001. **(c)** Relative mRNA levels of *sir-2.2* in *sir-2.3(ok444)* and *sir-2.3* in *sir-2.2(tm2673)* measured with qRT-PCR. Values are the average of three independent experiments, each done in triplicate across two biological replicates,  $\pm$ SEM

Figure 2

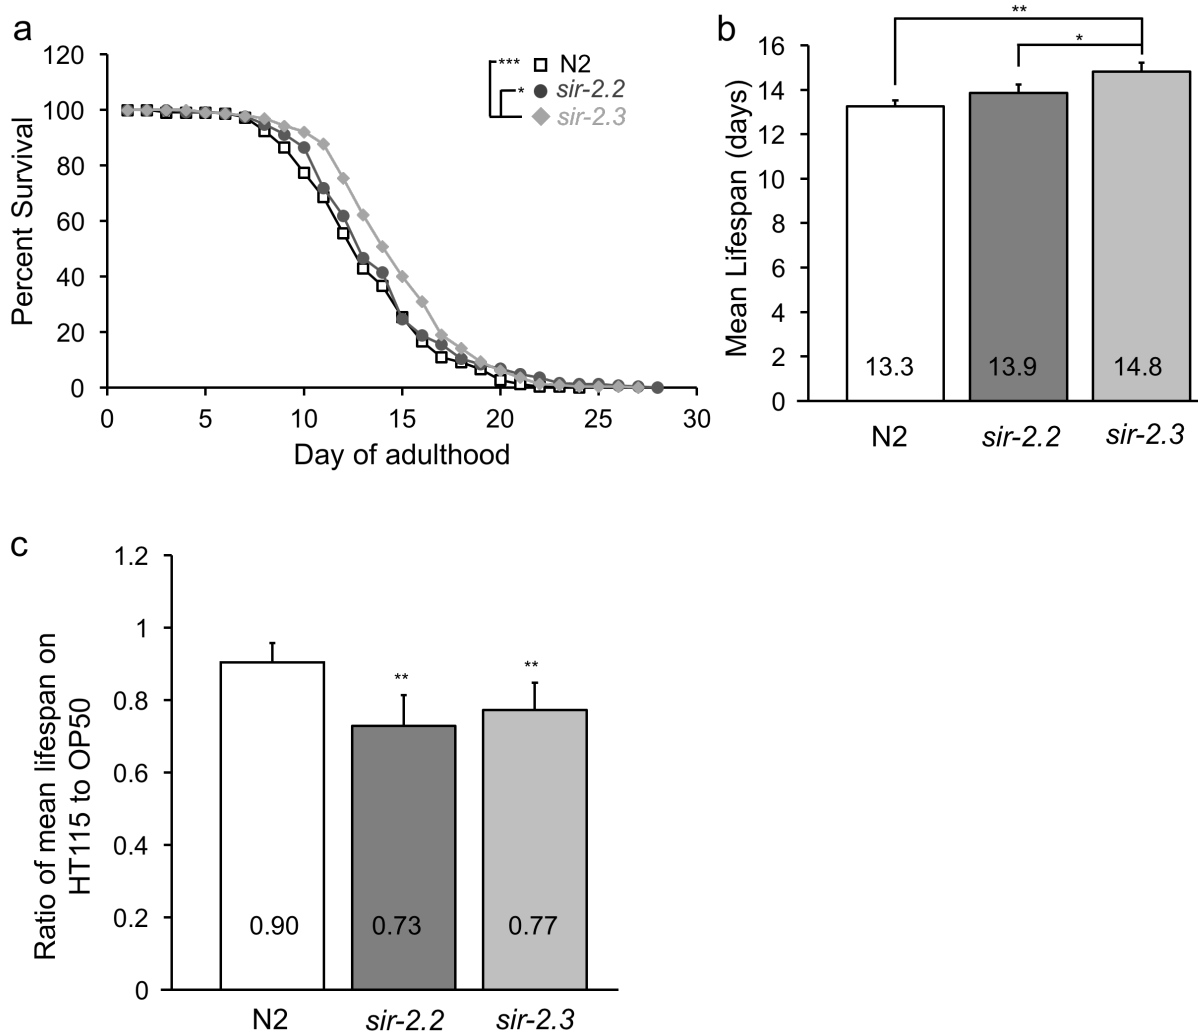

**Figure 2. *sir-2.2(tm2673)* and *sir-2.3(ok444)* lifespan on HT115.** (a) Survival curve of N2 control, *sir-2.2(tm2673)*, and *sir-2.3(ok444)* animals fed *ad libitum* on HT115 across four experiments (See Table S1). *sir-2.3(ok444)* has increased survival compared to N2 (\*\*\*) and to *sir-2.2(tm2673)* (\*) on HT115, log rank t-test. (b) Mean lifespan values  $\pm$ SEM of N2 control, *sir-2.2(tm2673)* and *sir-2.3(ok444)* when animals were fed HT115. Statistical analysis performed via one-way ANOVA followed by Tukey's post hoc test, where \*\*p<0.01, \*p<0.05. (c) Ratios of mean lifespan values of animals on HT115 to mean lifespan values of

animals on OP50 (See Figure 1b). Statistical analysis performed via one sample t-test comparing to 1 where  $**p < 0.01$ .

Figure 3

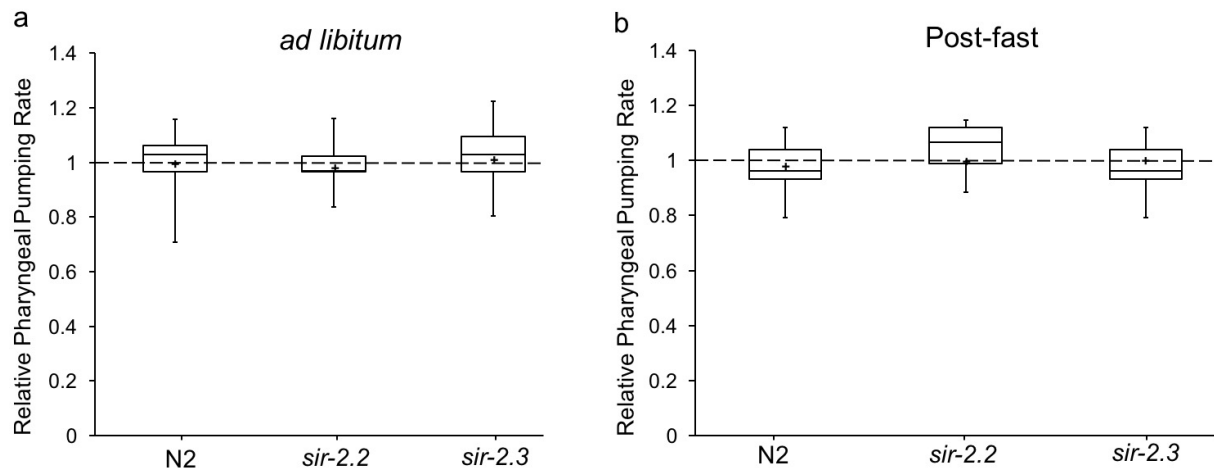

**Figure 3. Relative pharyngeal pumping rates of *sir-2.2(tm2673)* and *sir-2.3(ok444)*. (a)**

Animals fed OP50 *ad libitum*, N2 (n=30), *sir-2.2(tm2673)* (n=33), *sir-2.3(ok444)* (n=34). **(b)**

Animals fed OP50 for 5 minutes after six hour fasting period, N2 (n=28), *sir-2.2(tm2673)* (n=33),

*sir-2.3(ok444)* (n=36). Values are from three independent experiments. Box plot displays

minimum and maximum values, first quartile, median, and third quartile, where + denotes the

mean value.

Figure 4

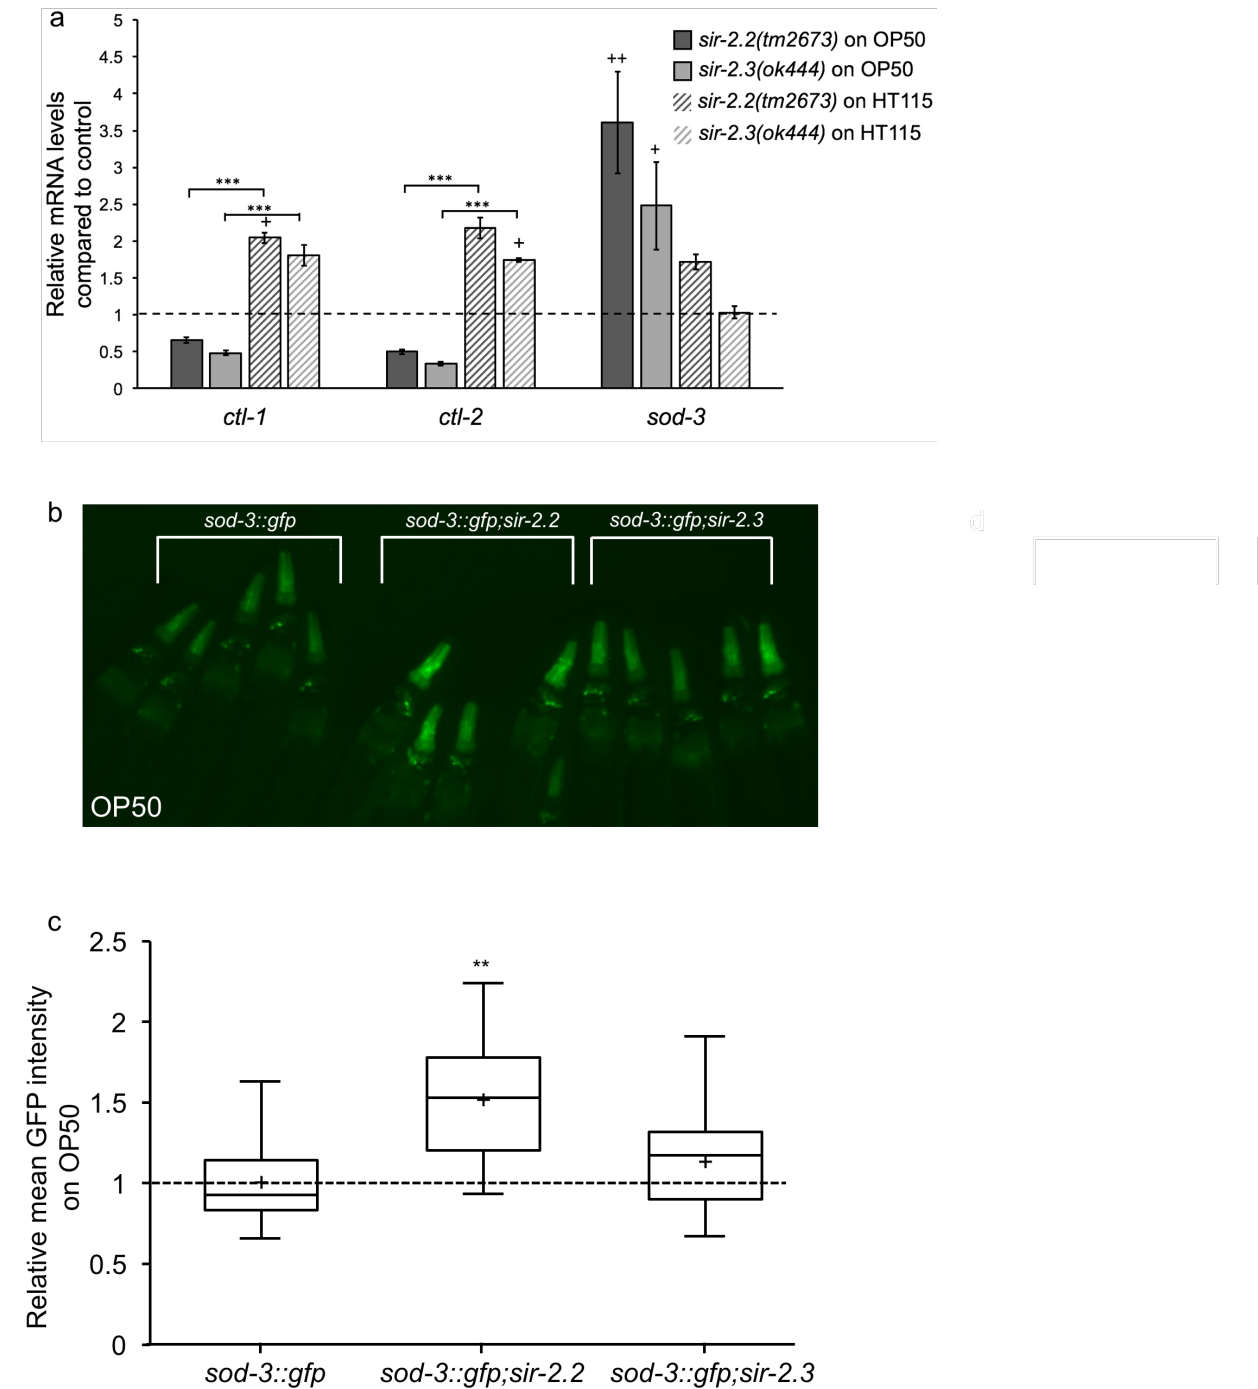

**Figure 4.** *sod-3*, *ctl-1*, and *ctl-2* expression in *sir-2.2(tm2673)* and *sir-2.3(ok444)* on OP50. (a) qRT-PCR was used to measure relative mRNA levels of *ctl-1*, *ctl-2*, and *sod-3* in N2 control, *sir-2.2(tm2673)*, and *sir-2.3(ok444)* fed either OP50 or HT115. Values are averages from two biological replicates, both done in triplicate, error bars represent SEM, \*\*\* $p < 0.001$  using



Student's t-test, + $p < 0.05$ , ++ $p < 0.01$  using one sample t-test comparing to 1. **(b)** Image representative of the relative GFP levels in the pharynx of *psod-3::gfp*, *psod-3::gfp; sir-2.2*, and *psod-3::gfp; sir-2.3* animals fed OP50. Image is of five day 1 adult animals of each genotype placed adjacent to one another, paralyzed with 1 mM levamisole and imaged simultaneously. **(c)** Quantification of the mean GFP intensity in the pharynx of *sod-3::gfp*, *sod-3::gfp; sir-2.2*, and *sod-3::gfp; sir-2.3* animals on OP50. Sample sizes were 33 to 35. Box plot displays minimum and maximum values, first quartile, median, and third quartile, where + denotes the mean value. Statistical analysis performed via one-way ANOVA followed by Tukey's post hoc test where \*\* $p < 0.01$ .

Figure 5

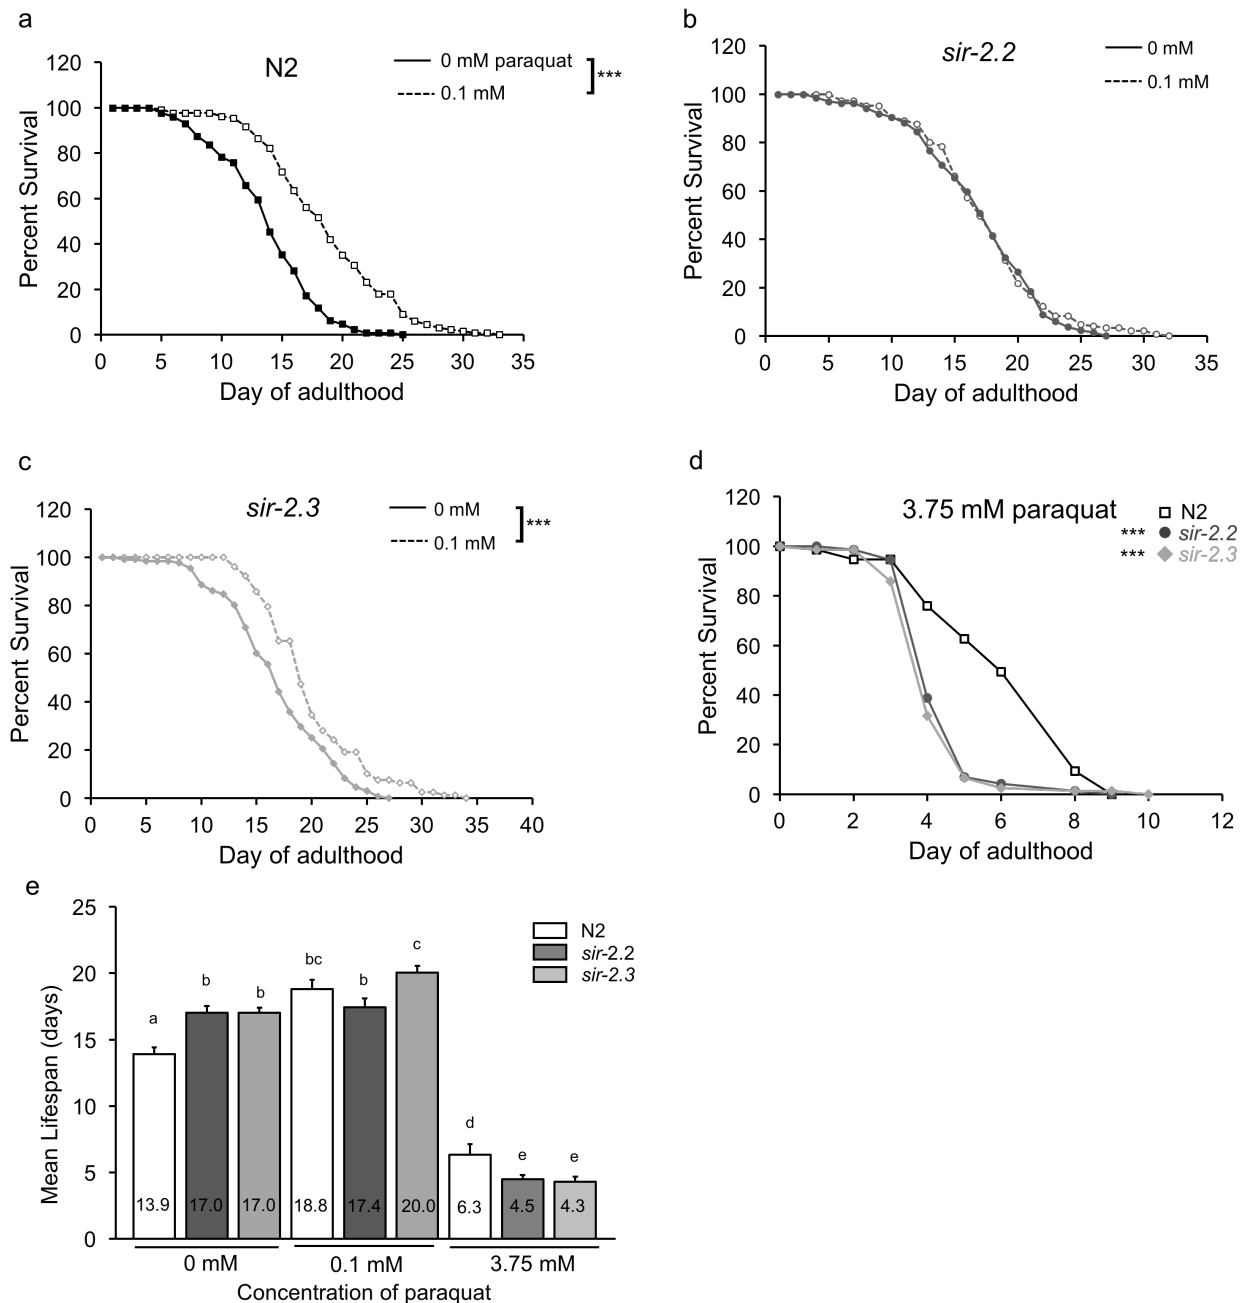

**Figure 5. *sir-2.2*(*tm2673*) and *sir-2.3*(*ok444*) lifespan on varying concentrations of paraquat.**

**(a,b,c)** Survival curve of *N2*, *sir-2.2*(*tm2673*), and *sir-2.3*(*ok444*) treated with 0.1 mM paraquat

and untreated, \*\*\* $p < 0.001$ , log rank t-test. **(d)** Survival curve of *N2*, *sir-2.2*(*tm2673*), and *sir-*

*2.3*(*ok444*) treated with 3.75 mM paraquat, \*\*\* $p < 0.001$ , log rank t-test. **(e)** Mean lifespan values

±SEM of N2, *sir-2.2(tm2673)*, *sir-2.3(ok444)* fed OP50 and treated with 0.1 mM, 1.0 mM, 3.75 mM or no paraquat. Values are from three independent experiments (see Table S2), one-way ANOVA followed by Tukey's post hoc test where different letters represent a statistical difference of  $p < 0.01$ .

## Chang et al, Supplementary Tables and Figures

Table S1. Mean lifespan values of N2, *sir-2.2(tm2673)*, and *sir-2.3(ok444)* fed *ad libitum* on HT115

| Experiment | Genotype               | Mean Lifespan±SEM | n  | p-value (one-way ANOVA) |
|------------|------------------------|-------------------|----|-------------------------|
| 1          | N2                     | 14.21±0.51        | 71 | p=0.009                 |
|            | <i>sir-2.2(tm2673)</i> | 16.00±0.61        | 65 |                         |
|            | <i>sir-2.3(ok444)</i>  | 16.37±0.42        | 70 |                         |
| 2          | N2                     | 12.57±0.43        | 47 | p=0.896                 |
|            | <i>sir-2.2(tm2673)</i> | 12.77±0.34        | 48 |                         |
|            | <i>sir-2.3(ok444)</i>  | 12.59±0.31        | 43 |                         |
| 3          | N2                     | 13.31±0.43        | 62 | p=.037                  |
|            | <i>sir-2.2(tm2673)</i> | 13.26±0.43        | 68 |                         |
|            | <i>sir-2.3(ok444)</i>  | 14.84±0.60        | 51 |                         |
| 4          | N2                     | 12.37±0.38        | 49 | p=.000179               |
|            | <i>sir-2.2(tm2673)</i> | 13.35±0.35        | 70 |                         |
|            | <i>sir-2.3(ok444)</i>  | 14.55±0.30        | 63 |                         |

Table S2. Mean lifespan values of N2, *sir-2.2(tm2673)*, and *sir-2.3(ok444)* treated with varying concentrations of paraquat

| Concentration of paraquat | Genotype               | Mean Lifespan±SEM | n   | p-value (one-way ANOVA) |
|---------------------------|------------------------|-------------------|-----|-------------------------|
| 0 mM                      | N2                     | 13.90±0.36        | 128 | p<0.0001                |
|                           | <i>sir-2.2(tm2673)</i> | 17.01±0.41        | 136 |                         |
|                           | <i>sir-2.3(ok444)</i>  | 17.01±0.41        | 131 |                         |
| 0.1 mM                    | N2                     | 18.79±0.44        | 134 | p= 0.000683             |
|                           | <i>sir-2.2(tm2673)</i> | 17.44±0.41        | 147 |                         |
|                           | <i>sir-2.3(ok444)</i>  | 20.04±0.51        | 78  |                         |
| 1.0 mM                    | N2                     | 7.67±0.20         | 132 | p<0.0001                |
|                           | <i>sir-2.2(tm2673)</i> | 10.00±0.31        | 136 |                         |
|                           | <i>sir-2.3(ok444)</i>  | 9.00±0.31         | 78  |                         |
| 3.75 mM                   | N2                     | 6.35±0.24         | 75  | p<0.0001                |
|                           | <i>sir-2.2(tm2673)</i> | 4.49±0.12         | 72  |                         |
|                           | <i>sir-2.3(ok444)</i>  | 4.30±0.13         | 73  |                         |

Figure S1.

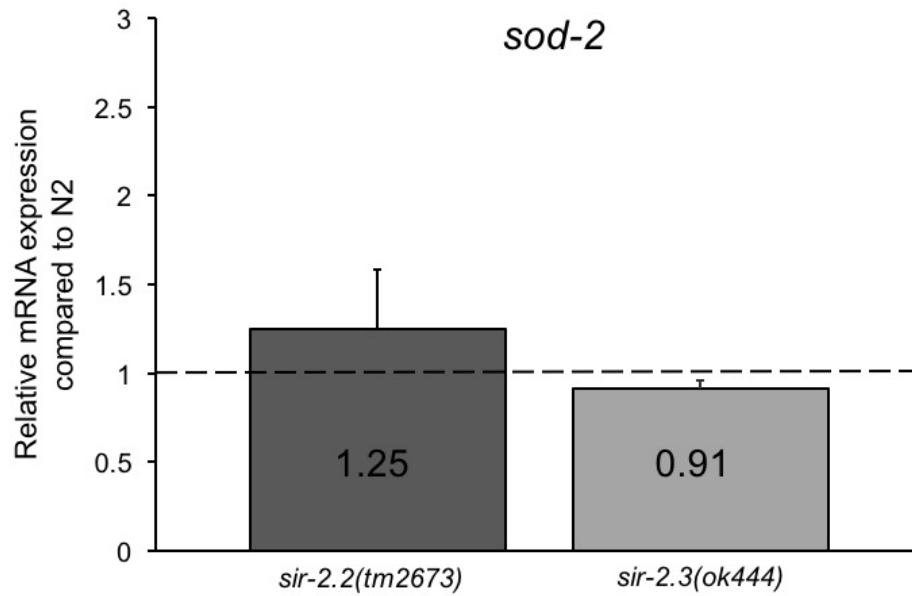

Figure S1. *sod-2* mRNA levels in mitochondrial sirtuin mutants *sir-2.2(tm2673)* or *sir-2.3(ok444)*. mRNA expression was measured with qRT-PCR and compared to N2 control. Values are averages from two biological replicates, each done in triplicate, error bars represent SEM.
